# Supplementary material
Source: MDPI journal article supplement (https://www.mdpi.com/2673-9801/4/2/11)
Supplement: s1 [file s1]

## Supporting Information

# Unveiling the Antioxidant Potential of Halophyte Plants and Seaweeds for Health Applications

Inês João Ferreira <sup>1,2,3,\*</sup>, Ana Rita C. Duarte <sup>1</sup>, Mário Diniz <sup>2,4</sup> and Ricardo Salgado <sup>1,3</sup>

<sup>1</sup> Associated Laboratory for Green Chemistry – Network of Chemical and Technology (LAQV-REQUIMTE), Department of Chemistry, NOVA School of Science and Technology, Universidade NOVA de Lisboa, Quinta da Torre, 2829-516 Caparica, Portugal; ard08968@fct.unl.pt (A.R.D.); ricardo.salgado@estsetu-bal.ips.pt (R.S.)

<sup>2</sup> Applied Molecular Bioscience Unit (UCIBIO), Department of Chemistry, NOVA School of Science and Technology, Universidade NOVA de Lisboa, Quinta da Torre, 2829-516 Caparica, Portugal; mesd@fct.unl.pt

<sup>3</sup> Marine and Environmental Sciences Centre – Setúbal polytechnical institute (MARE-IPS), Escola Superior de Tecnologia de Setúbal, Campus do IPS, Estefanilha, 2914-508 Setúbal, Portugal

<sup>4</sup> Associate Laboratory i4HB, Institute for Health and Bioeconomy, NOVA School of Science and Technology, Universidade NOVA de Lisboa, 2819-516 Caparica, Portugal

\* Correspondence: ij.ferreira@campus.fct.unl.pt

**Figure**

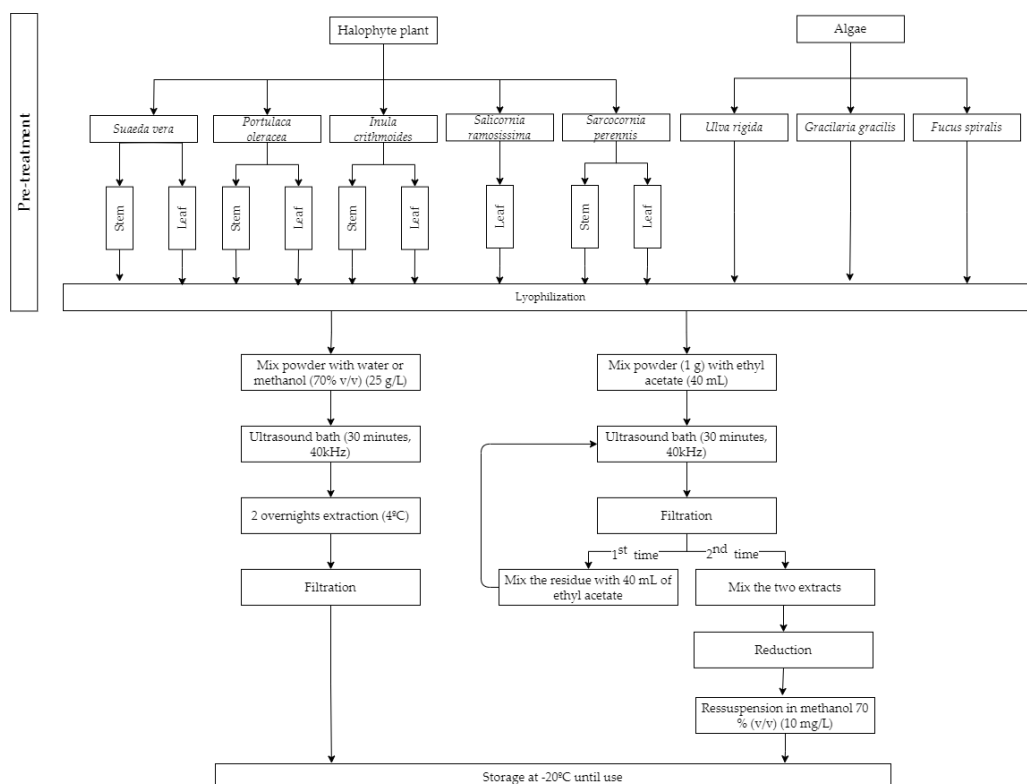

**Figure S1.** Workflow of the processing and extraction methodologies followed for halophytes and seaweeds.

## Tables

**Table S1.** Results (mean  $\pm$  s.d.) of the different assays performed (Lowry, ABTS, DPPH, FRAP, TPC and TFC) on halophyte plants. \* - statistical differences compared to the leaf of the corresponding halophyte plant. \*p < 0.05; \*\* p < 0.01; p < 0.001; p < 0.0001

| Lowry                         |                    |                                  |                                |
|-------------------------------|--------------------|----------------------------------|--------------------------------|
|                               |                    | Leaves (mg soluble protein/g DW) | Stem (mg soluble protein/g DW) |
| <i>Suaeda vera</i>            | Ethyl acetate      | 24.09 $\pm$ 1.53                 | 6.25 $\pm$ 0.22                |
|                               | Methanol 70% (v/v) | 86.34 $\pm$ 20.58                | 6.21 $\pm$ 0.34***             |
|                               | Water              | 147.20 $\pm$ 16.63               | 5.31 $\pm$ 0.70***             |
| <i>Portulaca oleracea</i>     | Ethyl acetate      | 12.42 $\pm$ 0.18                 | 6.38 $\pm$ 0.07                |
|                               | Methanol 70% (v/v) | 19.34 $\pm$ 0.54                 | 10.07 $\pm$ 1.02               |
|                               | Water              | 48.77 $\pm$ 9.91                 | 13.05 $\pm$ 0.80***            |
| <i>Inula crithmoides</i>      | Ethyl acetate      | 10.27 $\pm$ 0.17                 | 10.67 $\pm$ 0.35               |
|                               | Methanol 70% (v/v) | 52.55 $\pm$ 1.33                 | 15.71 $\pm$ 1.14***            |
|                               | Water              | 339.00 $\pm$ 2.2.5               | 49.13 $\pm$ 10.57***           |
| <i>Salicornia ramosissima</i> | Ethyl acetate      | 7.01 $\pm$ 0.10                  | ---                            |
|                               | Methanol 70% (v/v) | 60.02 $\pm$ 6.02                 | ---                            |
|                               | Water              | 59.70 $\pm$ 1.29                 | ---                            |
| <i>Sarcocornia perennis</i>   | Ethyl acetate      | 99.82 $\pm$ 15.42                | 57.14 $\pm$ 0.49***            |
|                               | Methanol 70% (v/v) | 28.46 $\pm$ 1.87                 | 6.63 $\pm$ 0.88*               |
|                               | Water              | 14.23 $\pm$ 2.66                 | 18.74 $\pm$ 1.50               |
| ABTS radical scavenging assay |                    |                                  |                                |
|                               |                    | Leaves (mg TE/g DW)              | Stem (mg TE/g DW)              |
| <i>Suaeda vera</i>            | Ethyl acetate      | 3.34 $\pm$ 0.19                  | 0.15 $\pm$ 0.10***             |
|                               | Methanol 70% (v/v) | 4.25 $\pm$ 0.07                  | 1.27 $\pm$ 0.11***             |
|                               | Water              | 1.40 $\pm$ 0.00                  | 0.18 $\pm$ 0.01***             |
| <i>Portulaca oleracea</i>     | Ethyl acetate      | 0.62 $\pm$ 0.09                  | 0.35 $\pm$ 0.08                |
|                               | Methanol 70% (v/v) | 7.92 $\pm$ 0.42                  | 1.32 $\pm$ 0.06***             |
|                               | Water              | 0.45 $\pm$ 0.04                  | 0.43 $\pm$ 0.06                |
| <i>Inula crithmoides</i>      | Ethyl acetate      | 1.13 $\pm$ 0.03                  | 1.40 $\pm$ 0.10                |
|                               | Methanol 70% (v/v) | 4.66 $\pm$ 0.01                  | 3.63 $\pm$ 0.23***             |
|                               | Water              | 1.50 $\pm$ 0.00                  | 0.84 $\pm$ 0.03***             |
| <i>Salicornia ramosissima</i> | Ethyl acetate      | 1.04 $\pm$ 0.04                  | ---                            |
|                               | Methanol 70% (v/v) | 4.61 $\pm$ 0.03                  | ---                            |
|                               | Water              | 0.74 $\pm$ 0.08                  | ---                            |
| <i>Sarcocornia perennis</i>   | Ethyl acetate      | 5.53 $\pm$ 0.09                  | 5.18 $\pm$ 0.26                |
|                               | Methanol 70% (v/v) | 3.00 $\pm$ 0.39                  | 2.34 $\pm$ 0.12***             |
|                               | Water              | 0.92 $\pm$ 0.04                  | 0.54 $\pm$ 0.02*               |
| DPPH assay                    |                    |                                  |                                |
|                               |                    | Leaves ( $\mu$ g TE/g DW)        | Stem ( $\mu$ g TE/g DW)        |
| <i>Suaeda vera</i>            | Ethyl acetate      | 2.89 $\pm$ 0.20                  | 0.40 $\pm$ 0.34***             |
|                               | Methanol 70% (v/v) | 6.03 $\pm$ 0.02                  | 0.61 $\pm$ 0.13***             |
|                               | Water              | 9.01 $\pm$ 0.78                  | 0.11 $\pm$ 0.01***             |
| <i>Portulaca oleracea</i>     | Ethyl acetate      | 0.68 $\pm$ 0.16                  | 0.29 $\pm$ 0.03                |
|                               | Methanol 70% (v/v) | 0.68 $\pm$ 0.02                  | 1.10 $\pm$ 0.11                |
|                               | Water              | 0.18 $\pm$ 0.02                  | 0.40 $\pm$ 0.04                |
| <i>Inula crithmoides</i>      | Ethyl acetate      | 0.78 $\pm$ 0.04                  | 0.33 $\pm$ 0.10                |

|                               |                    |                                 |                               |
|-------------------------------|--------------------|---------------------------------|-------------------------------|
|                               | Methanol 70% (v/v) | 7.31 ± 0.67                     | 1.17 ± 0.05****               |
|                               | Water              | 1.39 ± 0.57                     | 0.62 ± 0.28                   |
| <i>Salicornia ramosissima</i> | Ethyl acetate      | 0.50 ± 0.22                     | ---                           |
|                               | Methanol 70% (v/v) | 2.22 ± 0.23                     | ---                           |
|                               | Water              | 0.54 ± 0.10                     | ---                           |
| <i>Sarcocornia perennis</i>   | Ethyl acetate      | 5.33 ± 0.53                     | 1.70 ± 0.18****               |
|                               | Methanol 70% (v/v) | 0.73 ± 0.19                     | 1.32 ± 0.06                   |
|                               | Water              | 0.37 ± 0.02                     | 0.25 ± 0.13                   |
| <b>FRAP assay</b>             |                    |                                 |                               |
|                               |                    | <b>Leaves (μmol GAE / g DW)</b> | <b>Stem (μmol GAE / g DW)</b> |
| <i>Suaeda vera</i>            | Ethyl acetate      | 8.32 ± 0.14                     | 0.76 ± 0.11****               |
|                               | Methanol 70% (v/v) | 9.13 ± 0.25                     | 2.72 ± 0.13****               |
|                               | Water              | 13.52 ± 0.37                    | 0.67 ± 0.22****               |
| <i>Portulaca oleracea</i>     | Ethyl acetate      | 3.53 ± 0.12                     | 0.60 ± 0.11****               |
|                               | Methanol 70% (v/v) | 4.26 ± 0.34                     | 3.31 ± 0.16                   |
|                               | Water              | 1.95 ± 0.02                     | 2.52 ± 0.34                   |
| <i>Inula crithmoides</i>      | Ethyl acetate      | 1.54 ± 0.03                     | 2.01 ± 0.06                   |
|                               | Methanol 70% (v/v) | 14.49 ± 0.46                    | 5.89 ± 0.45****               |
|                               | Water              | 7.84 ± 0.43                     | 0.82 ± 0.05****               |
| <i>Salicornia ramosissima</i> | Ethyl acetate      | 2.06 ± 0.05                     | ---                           |
|                               | Methanol 70% (v/v) | 11.37 ± 0.89                    | ---                           |
|                               | Water              | 2.71 ± 0.03                     | ---                           |
| <i>Sarcocornia perennis</i>   | Ethyl acetate      | 19.05 ± 0.67                    | 6.52 ± 0.27****               |
|                               | Methanol 70% (v/v) | 6.96 ± 0.21                     | 4.05 ± 0.12****               |
|                               | Water              | 3.26 ± 0.06                     | 2.79 ± 0.09                   |
| <b>TPC</b>                    |                    |                                 |                               |
|                               |                    | <b>Leaves (mg GAE / g DW)</b>   | <b>Stem (mg GAE / g DW)</b>   |
| <i>Suaeda vera</i>            | Ethyl acetate      | 3.13 ± 0.17                     | 0.50 ± 0.02****               |
|                               | Methanol 70% (v/v) | 2.51 ± 0.23                     | 0.94 ± 0.07****               |
|                               | Water              | 4.50 ± 0.17                     | 0.02 ± 0.02****               |
| <i>Portulaca oleracea</i>     | Ethyl acetate      | 1.51 ± 0.04                     | 0.64 ± 0.01****               |
|                               | Methanol 70% (v/v) | 1.39 ± 0.12                     | 0.98 ± 0.08                   |
|                               | Water              | 0.38 ± 0.02                     | 0.41 ± 0.03                   |
| <i>Inula crithmoides</i>      | Ethyl acetate      | 1.42 ± 0.04                     | 1.81 ± 0.06                   |
|                               | Methanol 70% (v/v) | 4.18 ± 0.21                     | 2.00 ± 0.21****               |
|                               | Water              | 1.97 ± 0.30                     | 0.45 ± 0.11****               |
| <i>Salicornia ramosissima</i> | Ethyl acetate      | 1.35 ± 0.07                     | ---                           |
|                               | Methanol 70% (v/v) | 3.22 ± 0.19                     | ---                           |
|                               | Water              | 0.88 ± 0.18                     | ---                           |
| <i>Sarcocornia perennis</i>   | Ethyl acetate      | 8.87 ± 0.18                     | 5.95 ± 0.34****               |
|                               | Methanol 70% (v/v) | 1.82 ± 0.19                     | 1.32 ± 0.10*                  |
|                               | Water              | 0.79 ± 0.07                     | 0.62 ± 0.23                   |
| <b>TFC</b>                    |                    |                                 |                               |
|                               |                    | <b>Leaves (mg QE / g DW)</b>    | <b>Stem (mg QE / g DW)</b>    |
| <i>Suaeda vera</i>            | Ethyl acetate      | 12.68 ± 0.74                    | 2.43 ± 0.24                   |
|                               | Methanol 70% (v/v) | 14.03 ± 0.87                    | 2.32 ± 0.15*                  |
|                               | Water              | 11.70 ± 1.19                    | 0.47 ± 0.03*                  |
| <i>Portulaca oleracea</i>     | Ethyl acetate      | 7.45 ± 0.46                     | 3.10 ± 0.61                   |
|                               | Methanol 70% (v/v) | 3.76 ± 0.30                     | 4.50 ± 0.90                   |

|                               |                    |                   |                         |
|-------------------------------|--------------------|-------------------|-------------------------|
|                               | Water              | $0.08 \pm 0.08$   | $0.78 \pm 0.03$         |
|                               | Ethyl acetate      | $9.33 \pm 0.48$   | $9.59 \pm 0.69$         |
| <i>Inula crithmoides</i>      | Methanol 70% (v/v) | $47.27 \pm 14.22$ | $13.51 \pm 5.25^{****}$ |
|                               | Water              | $2.46 \pm 0.09$   | $1.28 \pm 0.09$         |
|                               | Ethyl acetate      | $5.91 \pm 0.67$   | ---                     |
| <i>Salicornia ramosissima</i> | Methanol 70% (v/v) | $30.91 \pm 6.10$  | ---                     |
|                               | Water              | $0.50 \pm 0.02$   | ---                     |
|                               | Ethyl acetate      | $13.48 \pm 1.07$  | $24.89 \pm 8.65^*$      |
| <i>Sarcocornia perennis</i>   | Methanol 70% (v/v) | $5.55 \pm 0.37$   | $3.95 \pm 0.08$         |
|                               | Water              | $1.07 \pm 0.11$   | $0.86 \pm 0.03$         |

**Table S2.** Results (mean  $\pm$  s.d.) of the different assays performed (Lowry, ABTS, DPPH, FRAP, TPC and TFC) on seaweed.

| Lowry                         |                    |                                          |
|-------------------------------|--------------------|------------------------------------------|
|                               | Ethyl acetate      | $6.00 \pm 0.28$ mg soluble protein/g DW  |
| <i>Gracilaria gracilis</i>    | Methanol 70% [v/v] | $6.98 \pm 0.32$ mg soluble protein/g DW  |
|                               | Water              | $4.99 \pm 0.28$ mg soluble protein/g DW  |
|                               | Ethyl acetate      | $6.18 \pm 0.13$ mg soluble protein/g DW  |
| <i>Fucus spiralis</i>         | Methanol 70% [v/v] | $7.61 \pm 1.39$ mg soluble protein/g DW  |
|                               | Water              | $44.73 \pm 4.00$ mg soluble protein/g DW |
|                               | Ethyl acetate      | $6.18 \pm 0.03$ mg soluble protein/g DW  |
| <i>Ulva rigida</i>            | Methanol 70% (v/v) | $33.40 \pm 2.05$ mg soluble protein/g DW |
|                               | Water              | $15.33 \pm 2.77$ mg soluble protein/g DW |
| ABTS radical scavenging assay |                    |                                          |
|                               | Ethyl acetate      | $0.30 \pm 0.02$ mg TE/g DW               |
| <i>Gracilaria gracilis</i>    | Methanol 70% (v/v) | $0.02 \pm 0.01$ mg TE/g DW               |
|                               | Water              | nd                                       |
|                               | Ethyl acetate      | $0.65 \pm 0.02$ mg TE/g DW               |
| <i>Fucus spiralis</i>         | Methanol 70% (v/v) | $3.61 \pm 0.10$ mg TE/g DW               |
|                               | Water              | $1.40 \pm 0.00$ mg TE/g DW               |
|                               | Ethyl acetate      | $0.32 \pm 0.04$ mg TE/g DW               |
| <i>Ulva rigida</i>            | Methanol 70% (v/v) | $0.70 \pm 0.03$ mg TE/g DW               |
|                               | Water              | $0.20 \pm 0.01$ mg TE/g DW               |
| DPPH assay                    |                    |                                          |
|                               | Ethyl acetate      | $0.62 \pm 0.09$ $\mu$ g TE/g DW          |
| <i>Gracilaria gracilis</i>    | Methanol 70% (v/v) | $0.14 \pm 0.02$ $\mu$ g TE/g DW          |
|                               | Water              | $0.13 \pm 0.02$ $\mu$ g TE/g DW          |
|                               | Ethyl acetate      | $0.81 \pm 0.22$ $\mu$ g TE/g DW          |
| <i>Fucus spiralis</i>         | Methanol 70% (v/v) | $0.49 \pm 0.06$ $\mu$ g TE/g DW          |
|                               | Water              | $1.13 \pm 0.35$ $\mu$ g TE/g DW          |
|                               | Ethyl acetate      | $0.35 \pm 0.03$ $\mu$ g TE/g DW          |
| <i>Ulva rigida</i>            | Methanol 70% (v/v) | $0.37 \pm 0.00$ $\mu$ g TE/g DW          |
|                               | Water              | $0.44 \pm 0.05$ $\mu$ g TE/g DW          |
| FRAP assay                    |                    |                                          |
|                               | Ethyl acetate      | $0.04 \pm 0.03$ $\mu$ mol GAE / g DW     |
| <i>Gracilaria gracilis</i>    | Methanol 70% (v/v) | $0.11 \pm 0.02$ $\mu$ mol GAE / g DW     |
|                               | Water              | $0.56 \pm 0.00$ $\mu$ mol GAE / g DW     |
|                               | Ethyl acetate      | $0.86 \pm 0.16$ $\mu$ mol GAE / g DW     |
| <i>Fucus spiralis</i>         | Methanol 70% (v/v) | $3.31 \pm 0.19$ $\mu$ mol GAE / g DW     |
|                               | Water              | $4.15 \pm 0.12$ $\mu$ mol GAE / g DW     |
|                               | Ethyl acetate      | $0.07 \pm 0.08$ $\mu$ mol GAE / g DW     |
| <i>Ulva rigida</i>            | Methanol 70% (v/v) | $2.54 \pm 0.07$ $\mu$ mol GAE / g DW     |

|                            |                    |                                                 |
|----------------------------|--------------------|-------------------------------------------------|
|                            | Water              | $1.40 \pm 0.19 \mu\text{mol GAE} / \text{g DW}$ |
| <b>TPC</b>                 |                    |                                                 |
| <i>Gracilaria gracilis</i> | Ethyl acetate      | $0.34 \pm 0.08 \text{ mg GAE} / \text{g DW}$    |
|                            | Methanol 70% (v/v) | $0.36 \pm 0.28 \text{ mg GAE} / \text{g DW}$    |
|                            | Water              | nd                                              |
| <i>Fucus spiralis</i>      | Ethyl acetate      | $0.70 \pm 0.09 \text{ mg GAE} / \text{g DW}$    |
|                            | Methanol 70% (v/v) | $0.94 \pm 0.06 \text{ mg GAE} / \text{g DW}$    |
|                            | Water              | $1.59 \pm 0.32 \text{ mg GAE} / \text{g DW}$    |
| <i>Ulva rigida</i>         | Ethyl acetate      | $0.29 \pm 0.04 \text{ mg GAE} / \text{g DW}$    |
|                            | Methanol 70% (v/v) | $0.74 \pm 0.07 \text{ mg GAE} / \text{g DW}$    |
|                            | Water              | $0.29 \pm 0.01 \text{ mg GAE} / \text{g DW}$    |
| <b>TFC</b>                 |                    |                                                 |
| <i>Gracilaria gracilis</i> | Ethyl acetate      | nd                                              |
|                            | Methanol 70% (v/v) | $0.80 \pm 0.36 \text{ mg QE} / \text{g DW}$     |
|                            | Water              | nd                                              |
| <i>Fucus spiralis</i>      | Ethyl acetate      | nd                                              |
|                            | Methanol 70% (v/v) | $9.37 \pm 1.50 \text{ mg QE} / \text{g DW}$     |
|                            | Water              | $2.69 \pm 0.09 \text{ mg QE} / \text{g DW}$     |
| <i>Ulva rigida</i>         | Ethyl acetate      | $6.90 \pm 1.20 \text{ mg QE} / \text{g DW}$     |
|                            | Methanol 70% (v/v) | $7.78 \pm 0.49 \text{ mg QE} / \text{g DW}$     |
|                            | Water              | $1.44 \pm 0.08 \text{ mg QE} / \text{g DW}$     |
